# Supplementary material
Source: PubMed Central journal article supplement (PMC7893263)
Supplement: rspb20203092supp1.pdf [file rspb20203092supp1.pdf]

1 *Electronic Supplementary Material – ESM*

2 Proceedings of the Royal Society of London, Biological Sciences

3 DOI: 10.1098/rspb.2020.3092

4

5 Social groups with diverse personalities mitigate physiological  
6 stress in a songbird

7 Csongor I. Vágási<sup>1,2,†</sup>, Attila Fülöp<sup>3,4,†</sup>, Gergely Osváth<sup>1,2,5</sup>, Péter L. Pap<sup>1,2</sup>, Janka  
8 Péntzes<sup>1</sup>, Zoltán Benkő<sup>1,6</sup>, Ádám Z. Lendvai<sup>2</sup> and Zoltán Barta<sup>3</sup>

9

10 2. Material and methods

11 (a) Study protocol

12 The study is based on a large sample of 240 house sparrows. We caught 40 sparrows during each  
13 study replicate (1:1 sex ratio). Sparrows were caught with mist nets at a cattle farm near Bălcaciu  
14 village, central Transylvania, Romania (46°11'N, 24°3'E) during six capture sessions (9  
15 November 2014, 5 December 2014, 5 January 2015, 23 January 2015, 10 February 2015, and 28  
16 February 2015). Upon capture (day 0), birds were marked with an aluminium ring, and their sex  
17 and body mass ( $\pm 0.1$  g) was recorded. The birds were transported to the campus of the Babeş-  
18 Bolyai University, Cluj-Napoca (46°46'N, 23°33'E) and housed in indoor aviaries for 18 days.

19

20 (b) Study timeline

21 The study timeline was the same for all six replicates. We let the birds to habituate to captivity on  
22 the day of capture (day 0) and the next two days (days 1–2). They were housed in four indoor  
23 aviary rooms (3 m length × 2 m width × 2.5 m height) in which the birds were distributed  
24 randomly in groups of equal sizes (10 birds in each room). The aviary rooms were visually  
25 separated from each other. To assess the exploratory behaviour of birds in a novel environment,  
26 we first transferred them into individual cages in the morning of day 3 and let them to habituate  
27 for two days (days 3–4), then tested for exploration on days 5–7 (see below the details). Day 8  
28 was a resting day. At day 9, we measured the body mass and tarsus length ( $\pm 0.01$  mm) of the  
29 birds, and took the pre-treatment blood sample (150–200  $\mu$ L; see below the methods). Then the  
30 birds were allocated according to an *a priori* defined protocol into one of four social treatment  
31 groups of 10 birds each (see below). These four social groups of 10 birds in each of the six study  
32 replicates were housed in the same four adjacent aviary rooms as mentioned above. Each social  
33 group had an even or quasi-even sex ratio (table S1). The social treatment period lasted nine days  
34 until day 18, when we measured again the body mass and took a second blood sample to measure  
35 the post-treatment physiological condition. On the same day, we released the birds at the site of  
36 capture.

37

38 **Table S1.** Sex ratio as shown by the sample sizes per each sex (F – female, M – male) per each  
 39 experimental group per each study replicate. Each group was formed by 10 birds during each  
 40 study replicate totalling 40 birds per study replicate and 240 birds for the entire study.

|              | social treatment group |   |          |   |     |   |      |   |
|--------------|------------------------|---|----------|---|-----|---|------|---|
|              | random                 |   | variable |   | low |   | high |   |
|              | F                      | M | F        | M | F   | M | F    | M |
| replicate #1 | 4                      | 6 | 5        | 5 | 6   | 4 | 5    | 5 |
| replicate #2 | 6                      | 4 | 6        | 4 | 4   | 6 | 4    | 6 |
| replicate #3 | 5                      | 5 | 3        | 7 | 7   | 3 | 5    | 5 |
| replicate #4 | 5                      | 5 | 3        | 7 | 7   | 3 | 5    | 5 |
| replicate #5 | 7                      | 3 | 4        | 6 | 5   | 5 | 4    | 6 |
| replicate #6 | 7                      | 3 | 4        | 6 | 5   | 5 | 4    | 6 |

41

42 (c) Housing and ethical note

43 Birds were transported within max. 4 h from capture into aviaries. To increase the sparrow’s  
 44 comfort, aviaries were enriched with several perches and one nest box per bird for resting, hiding  
 45 and roosting, and a water tank was full-time available for bathing. The artificial photoperiod was  
 46 identical to the natural day–night cycle throughout. Birds were fed *ad libitum* with a seed mixture  
 47 consisting of ground corn, barley, millet and sunflower, and this diet was supplemented with one  
 48 grated boiled egg per aviary room every other day [1,2]. Fresh drinking water was provided on a  
 49 daily basis. None of the birds died during the study and all of them were released at the site of  
 50 capture in good health.

51

52 (d) Exploratory behaviour

53 When transferred into individual cages (day 3), birds were randomly ordered from 1 to 40 and  
 54 split into three clusters (first 13, next 14, and last 13 birds). Their exploration test was performed

55 according to this 1–40 order on days 5–7 (one cluster was tested each day). We recorded  
56 exploratory behaviour as a well-established axis of personality following the novel environment  
57 test of Dingemanse et al. [3]. Sparrows were deprived of food and water for 1 h before the novel  
58 environment test started. Their cage was moved to the test room 10 min before the test run and  
59 was covered with a dark curtain, so birds were left to calm down in complete darkness and  
60 quietness before the test run. The birds entered the test room from their cage through a sliding  
61 door after being startled by knocking the wall of the cage, but without being handled or seeing  
62 any person. They were tested alone by spending 10 min in the test room (3 m length  $\times$  2 m width  
63  $\times$  2 m height) that contained four artificial wooden trees with four branches each and arranged  
64 symmetrically within the test room. Exploratory behaviour was video recorded through a one-  
65 way window with a hand-held video camera (Panasonic HC-V510) between 09:00 and 16:00  
66 (schedule of the test runs: 09:00, 09:30, 10:00, 10:30, 11:00, 11:30, 12:00, 12:30, 13:00, 13:30,  
67 14:00, 14:30, 15:00, and 15:30) by the same person (A.F.). Exploratory score is the total number  
68 of hops (performed either on the trees or on the ground) and flights during the 10-min test. The  
69 exploratory behaviour was scored by the same person (Z.Be.).

70 An additional set of 40 birds that were not involved in the social experiment were  
71 assessed thrice for their exploratory behaviour in the same novel environment as the 240  
72 experimental birds in order to verify whether this behavioural trait is consistent in time, a  
73 prerequisite of personality traits. The timeline and housing condition for these 40 birds were  
74 identical with those 240 birds that were involved in the six study replicates (i.e. they were housed  
75 under the same conditions and spent the same number of days before the first test and between  
76 the consecutive tests). Consistency of the exploratory behaviour was measured by calculating  
77 individual repeatability (i.e. separating variation in exploratory score into a within-individual and

78 an among-individuals component) using a linear mixed-effects model (R package ‘rptR’ [4]) as  
79 per Nakagawa and Schielzeth [5]. Exploration score was first  $\log(x+1)$ -transformed and then Z-  
80 transformed (i.e. scaled to mean = 0 and standard deviation = 1; [6]). We first built a full model  
81 in which exploration score was the dependent variable with sex (male/female), exploration test  
82 repeat (first/second/third), aviary room (from one to four) where the birds were kept between test  
83 repeats, and their second-order interaction were entered as potential confounding fixed effects,  
84 and individual’s ID, test day (three test days; see above), and the novel environment test order  
85 (1–40) nested within test day were entered as random factors. The minimal model was obtained  
86 by sequentially dropping all the non-significant fixed predictors from the full model until only  
87 significant effects remained. Individuals were significantly consistent in their exploratory  
88 behaviour across the three exploration test repeats in both the full model and minimal model (full  
89 model:  $R = 0.472$ , s.e. = 0.098, 95% confidence interval = 0.305–0.687,  $p < 0.001$ ; minimal  
90 model:  $R = 0.416$ , s.e. = 0.099, 95% confidence interval = 0.200–0.588,  $p < 0.001$ ).

91

## 92 (e) Social treatment

93 The social treatment consisted of creating four groups that differed in personality composition:  
94 ‘random’ (random subsample of birds of a given replicate), ‘variable’ (equal mixture of birds  
95 with either low or high exploration scores), ‘low-exploratory’ (only birds with low scores), and  
96 ‘high-exploratory’ (only birds with high scores). For this, we first ranked the 40 birds of each  
97 study replicate according to their exploration score in an increasing order (i.e. rank #1 is the least  
98 exploratory bird). The ‘random’ group was set up by forming 10 quartets along this rank order  
99 (i.e. first quartet consisting of birds ranking #1–4 and the last quartet of birds ranking #37–40),  
100 randomizing the order within each quartet, and then choosing the first bird from each quartet. The

101 ‘variable’ group was set up by reordering the remaining 30 birds, forming 15 duos along this rank  
 102 order, randomizing the order of birds within each duo, and choosing the first bird from the first  
 103 five and the last five duos. The remaining 20 birds were reordered once again and the first 10  
 104 birds along this exploration rank order formed the ‘low-exploratory’ group, while the last 10  
 105 birds formed the ‘high-exploratory’ group. The goodness of this protocol was *a priori* assessed  
 106 by generating 40 random exploration scores with uniform, normal or exponential distribution.  
 107 The group formation protocol worked for each of the three distribution types as the four groups  
 108 the protocol created differed both according to mean and to variance of exploration scores.

109

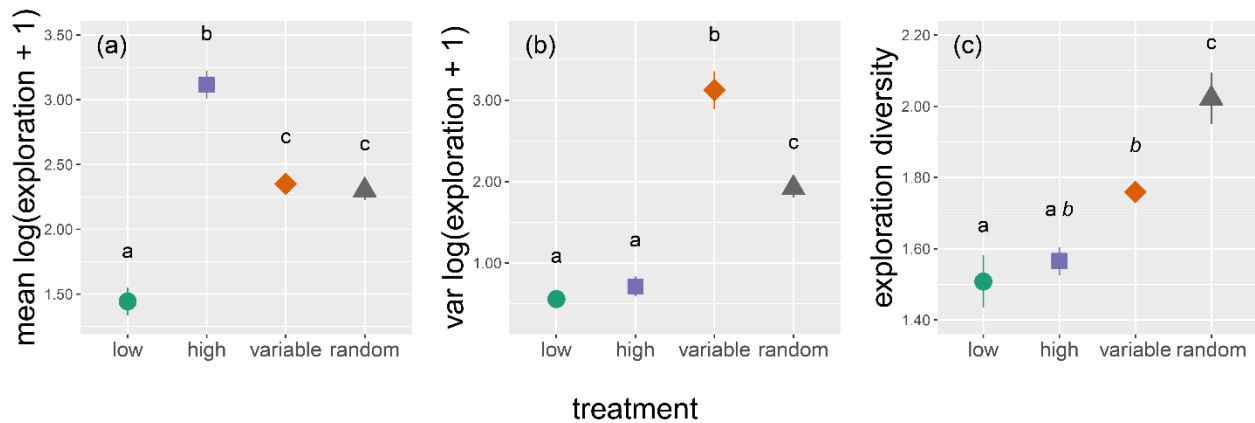

110

111 **Figure S1.** Treatment groups differ according to (a) mean, (b) variance and (c) Shannon diversity  
 112 index of personality (i.e. exploration score). Means  $\pm$  s.e. are shown on raw data. Different  
 113 lowercase letters denote significant differences ( $p \leq 0.050$ ), while similar but italicized letters  
 114 denote marginal differences ( $0.050 < p < 0.100$ ) between social treatment groups based on post-  
 115 hoc pairwise comparisons with Tukey-adjusted  $p$ -values.

116

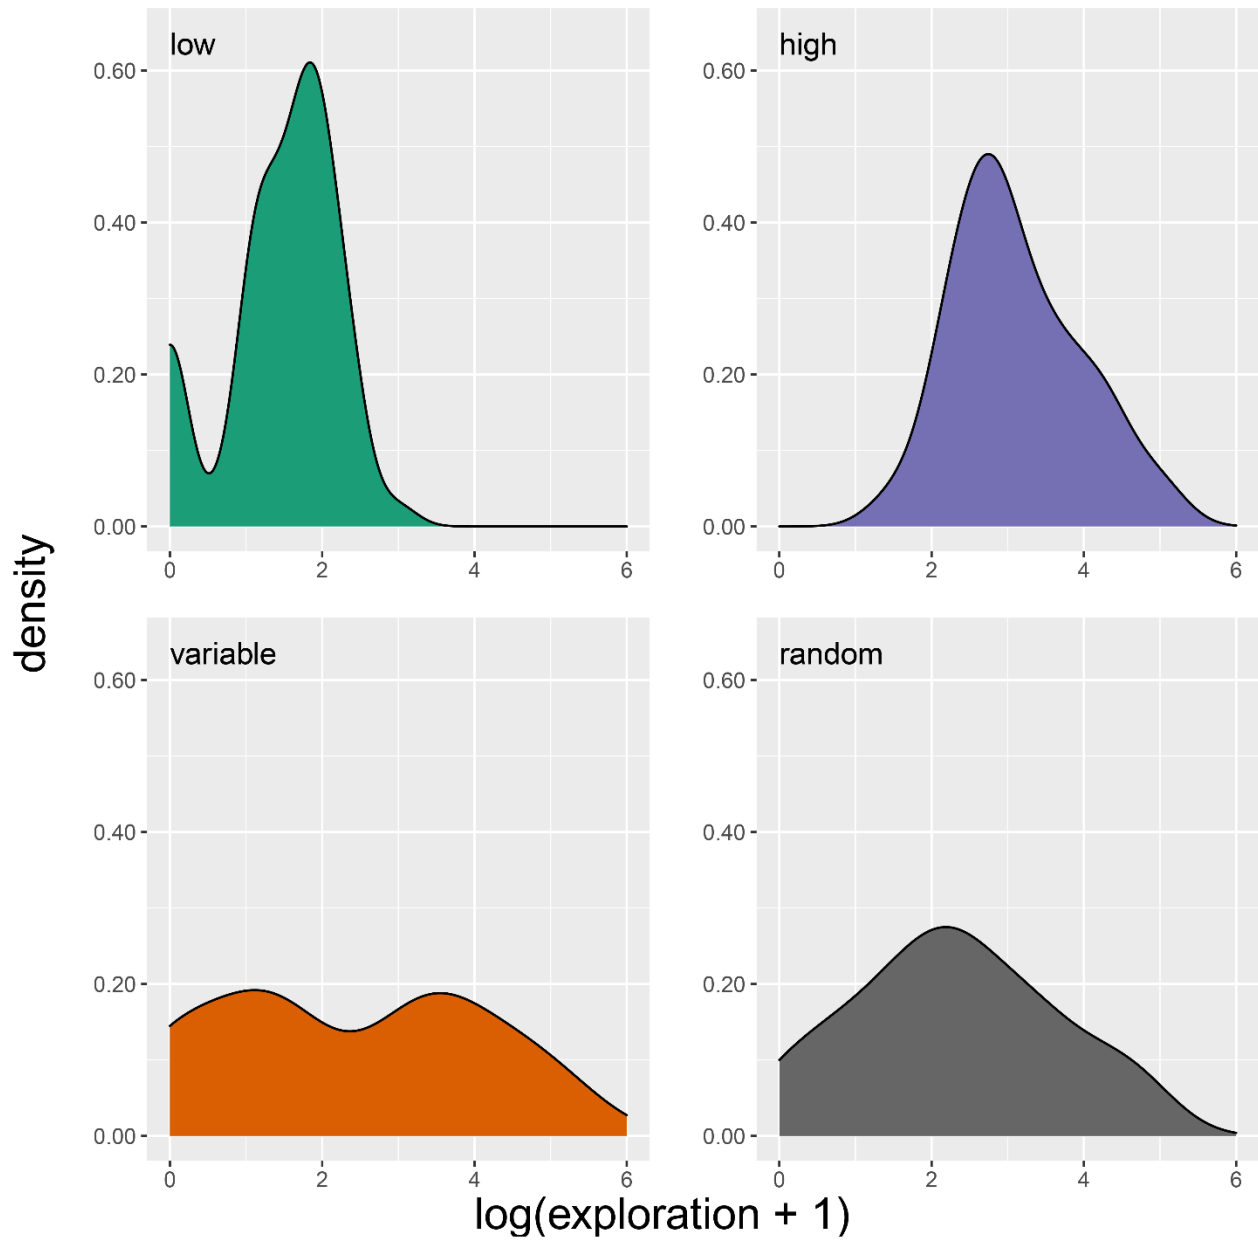

117

118 **Figure S2.** Treatment groups differ according to the density distribution of exploration score.

119 The random and variable groups have wider distribution, unimodal in the random group, but  
 120 bimodal in the variable group. The high- and low-exploratory groups have narrow distributions at  
 121 the upper or lower range limit, respectively.

122

123 (f) Blood sampling

124 Blood samples were collected on day 9 and day 18 to assess the physiological state before and  
125 after the social treatment period, respectively. Blood samples were collected into heparinized  
126 capillaries by puncturing the brachial vein with insulin syringe. A drop of blood was smeared  
127 onto a microscope slide for counting leucocytes. The capillaries with blood samples were stored  
128 in dark cooling boxes at 4°C for max. 4 h until centrifuged (5 min at 6200 g) to separate the  
129 plasma and erythrocyte fractions. Plasma was partitioned into aliquots for each physiological  
130 parameter and all aliquots were stored at -50°C until the laboratory assay took place.

131

132 (g) Physiological parameters

133 We measured the following five parameters to describe the physiological state of the birds. First,  
134 we computed a size-corrected body mass index to characterize the individuals' body condition  
135 (i.e. the relative amount of energy stores in the form of muscle and fat). For this, we used the  
136 Scaled Mass Index [7] (for details, see [8]). Second, 50 leukocytes were counted from blood  
137 smears by G.O. (for details, see [9,10]). Heterophil-to-lymphocyte ratio was used as an indicator  
138 of glucocorticoid-mediated stress response [11]. Because all the leukocytes were heterophils on  
139 some smears, heterophil-to-lymphocyte ratio was calculated as heterophils / (heterophils +  
140 lymphocytes); thus, a value close to 1 indicates higher physiological stress. Third, oxidative  
141 stress was assessed by J.P. and C.I.V. by measuring the amount of oxidative damage to cell  
142 membrane phospholipids via the plasma concentration of malondialdehyde, a toxic intermediate  
143 of oxidative lipid decomposition (for details, see [12]). Fourth, the level of natural antibodies  
144 (agglutination score) and the activity of the complement system (lysis score) as two associated



145 measures of the constitutive innate immune system was assessed by J.P. and C.I.V. via a  
 146 haemagglutination–haemolysis assay [13] (for details, see [14]). Higher scores mean that the  
 147 immune system constituents of the plasma can agglutinate or lyse foreign red blood cells at lower  
 148 concentration (i.e. indicate better immune capacity).

149

### 150 3. Additional results

151 There was no significant difference among treatment groups in the pre-treatment values of the  
 152 five physiological variables (body condition, SMI:  $\chi^2 = 0.333$ ,  $df = 3$ ,  $p = 0.954$ ; heterophil-to-  
 153 lymphocyte ratio, H/L:  $\chi^2 = 2.441$ ,  $df = 3$ ,  $p = 0.486$ ; malondialdehyde, MDA:  $\chi^2 = 4.790$ ,  $df = 3$ ,  
 154  $p = 0.188$ ; agglutination:  $\chi^2 = 1.335$ ,  $df = 3$ ,  $p = 0.721$ ; lysis:  $\chi^2 = 2.007$ ,  $df = 3$ ,  $p = 0.571$ ).

155

156 **Table S2.** Spearman rank correlation coefficients for the pair-wise correlations of the five  
 157 physiological response variables (SMI – Scaled Mass Index (body condition); H/L ratio –  
 158 heterophil-to-lymphocyte ratio (indicator of physiological stress); MDA – malondialdehyde  
 159 (oxidative damage to lipids); agglutination – level of natural antibodies; lysis – activity of the  
 160 complement system). Upper matrix (i.e. above the diagonal) shows the coefficients for the pre-  
 161 treatment sampling event, while the lower matrix (i.e. below the diagonal) shows those for the  
 162 post-treatment sampling event.

|               | SMI    | H/L ratio | MDA    | agglutination | lysis  |
|---------------|--------|-----------|--------|---------------|--------|
| SMI           | –      | –0.036    | –0.051 | 0.095         | 0.157  |
| H/L ratio     | –0.058 | –         | 0.038  | –0.037        | –0.146 |
| MDA           | 0.014  | –0.057    | –      | 0.121         | 0.037  |
| agglutination | 0.038  | –0.170    | 0.230  | –             | 0.624  |
| lysis         | 0.109  | –0.165    | 0.140  | 0.683         | –      |

163

164 **Table S3.** Parameter estimates of full models and minimal adequate models of individual  
165 responses in physiological state of house sparrows during the social treatment period. Full models  
166 contain all the predictors, while minimal models contain the significant predictors and the  
167 sampling event  $\times$  treatment interaction even if not significant (predictor of interest). Statistically  
168 significant effects ( $t$ -value or  $z$ -value  $\geq 2$ ) are marked in bold, while marginally significant effects  
169 are marked in italic ( $1.8 < t$ -value or  $z$ -value  $< 2$ ). (a) SMI – Scaled Mass Index (body condition),  
170 (b) H/L ratio – heterophil-to-lymphocyte ratio (indicator of physiological stress), (c) MDA –  
171 malondialdehyde (oxidative damage to lipids), (e) Agglutination – level of natural antibodies, (f)  
172 Lysis – activity of the complement system. Predictors: social treatment (HVG – variable group,  
173 experimental group with high exploratory behaviour variance; HEG – high-exploratory group,  
174 experimental group of birds with high exploratory behaviour; LEG – low-exploratory group,  
175 experimental group of birds with low exploratory behaviour; reference level is the random group,  
176 experimental group with a random sample of the exploratory behaviour range), S – sex (male is  
177 the reference level), SE – sampling event (pre-treatment is the reference level), EB – exploratory  
178 behaviour. Random effects: REP – study replicate ID, T – social treatment, ID – individual ID.  
179 For random effects,  $\sigma^2$  is the residual variance, while  $\tau_{00}$  is the variance explained by random  
180 factors.

|                                   | full model               |              |              | min. adequate model      |              |              |
|-----------------------------------|--------------------------|--------------|--------------|--------------------------|--------------|--------------|
| fixed effects                     | $\beta$                  | s.e.         | $t$ -value   | $\beta$                  | s.e.         | $t$ -value   |
| intercept                         | 0.351                    | 0.193        | 1.821        | 0.297                    | 0.143        | 2.069        |
| <b>SE</b>                         | <b>0.295</b>             | <b>0.086</b> | <b>3.442</b> | <b>0.231</b>             | <b>0.074</b> | <b>3.123</b> |
| HVG                               | -0.210                   | 0.254        | 0.827        | -0.078                   | 0.179        | 0.435        |
| HEG                               | -0.350                   | 0.290        | 1.205        | -0.128                   | 0.179        | 0.719        |
| LEG                               | -0.159                   | 0.306        | 0.519        | -0.083                   | 0.178        | 0.468        |
| <b>S</b>                          | <b>-0.524</b>            | <b>0.254</b> | <b>2.063</b> | <b>-0.449</b>            | <b>0.121</b> | <b>3.696</b> |
| EB                                | 0.082                    | 0.149        | 0.552        |                          |              |              |
| <b>SE <math>\times</math> HVG</b> | <b>-0.276</b>            | <b>0.105</b> | <b>2.624</b> | <b>-0.258</b>            | <b>0.105</b> | <b>2.465</b> |
| <b>SE <math>\times</math> HEG</b> | <b>-0.402</b>            | <b>0.108</b> | <b>3.737</b> | <b>-0.375</b>            | <b>0.105</b> | <b>3.581</b> |
| <b>SE <math>\times</math> LEG</b> | <b>-0.278</b>            | <b>0.108</b> | <b>2.573</b> | <b>-0.292</b>            | <b>0.105</b> | <b>2.789</b> |
| SE $\times$ S                     | -0.113                   | 0.077        | 1.468        |                          |              |              |
| SE $\times$ EB                    | 0.022                    | 0.042        | 0.530        |                          |              |              |
| HVG $\times$ S                    | 0.305                    | 0.364        | 0.840        |                          |              |              |
| HEG $\times$ S                    | 0.277                    | 0.360        | 0.768        |                          |              |              |
| LEG $\times$ S                    | 0.162                    | 0.364        | 0.445        |                          |              |              |
| HVG $\times$ EB                   | -0.022                   | 0.164        | 0.132        |                          |              |              |
| HEG $\times$ EB                   | 0.009                    | 0.237        | 0.039        |                          |              |              |
| LEG $\times$ EB                   | -0.099                   | 0.256        | 0.389        |                          |              |              |
| S $\times$ EB                     | 0.099                    | 0.144        | 0.686        |                          |              |              |
| random effects                    |                          |              |              |                          |              |              |
| $\sigma^2$                        | 0.16                     |              |              | 0.16                     |              |              |
| $\tau_{00}$                       | 0.80 <sub>REP:T:ID</sub> |              |              | 0.79 <sub>REP:T:ID</sub> |              |              |
|                                   | 0.00 <sub>REP:T</sub>    |              |              | 0.00 <sub>REP:T</sub>    |              |              |
|                                   | 0.00 <sub>REP</sub>      |              |              | 0.00 <sub>REP</sub>      |              |              |
| $n$                               | 6 REP                    |              |              | 6 REP                    |              |              |
|                                   | 4 T                      |              |              | 4 T                      |              |              |
|                                   | 240 ID                   |              |              | 240 ID                   |              |              |
| observations                      | 480                      |              |              | 480                      |              |              |
| marg. $R^2$ ; cond. $R^2$         | 0.337 / NA               |              |              | 0.282 / NA               |              |              |

| fixed effects                     | full model               |              |                 | min. adequate model      |              |                 |
|-----------------------------------|--------------------------|--------------|-----------------|--------------------------|--------------|-----------------|
|                                   | $\beta$                  | s.e.         | <i>t</i> -value | $\beta$                  | s.e.         | <i>t</i> -value |
| intercept                         | 0.233                    | 0.244        | 0.954           | 0.224                    | 0.226        | 0.992           |
| <b>SE</b>                         | <b>-0.567</b>            | <b>0.193</b> | <b>2.943</b>    | <b>-0.542</b>            | <b>0.191</b> | <b>2.834</b>    |
| HVG                               | -0.230                   | 0.210        | 1.094           | -0.216                   | 0.167        | 1.294           |
| HEG                               | -0.167                   | 0.234        | 0.714           | -0.184                   | 0.167        | 1.104           |
| LEG                               | -0.169                   | 0.243        | 0.697           | -0.194                   | 0.166        | 1.166           |
| S                                 | -0.179                   | 0.196        | 0.912           | -0.152                   | 0.119        | 1.278           |
| EB                                | -0.001                   | 0.114        | 0.012           |                          |              |                 |
| SE $\times$ HVG                   | 0.470                    | 0.236        | 1.991           | 0.468                    | 0.236        | 1.979           |
| <b>SE <math>\times</math> HEG</b> | <b>0.559</b>             | <b>0.241</b> | <b>2.316</b>    | <b>0.617</b>             | <b>0.236</b> | <b>2.616</b>    |
| <b>SE <math>\times</math> LEG</b> | <b>0.494</b>             | <b>0.242</b> | <b>2.035</b>    | 0.428                    | 0.235        | 1.821           |
| <b>SE <math>\times</math> S</b>   | <b>0.372</b>             | <b>0.172</b> | <b>2.160</b>    | 0.329                    | 0.168        | 1.961           |
| SE $\times$ EB                    | 0.103                    | 0.095        | 1.086           |                          |              |                 |
| HVG $\times$ S                    | 0.012                    | 0.255        | 0.046           |                          |              |                 |
| HEG $\times$ S                    | 0.128                    | 0.253        | 0.505           |                          |              |                 |
| LEG $\times$ S                    | -0.138                   | 0.256        | 0.542           |                          |              |                 |
| HVG $\times$ EB                   | -0.025                   | 0.114        | 0.220           |                          |              |                 |
| HEG $\times$ EB                   | -0.094                   | 0.166        | 0.563           |                          |              |                 |
| LEG $\times$ EB                   | -0.056                   | 0.180        | 0.312           |                          |              |                 |
| S $\times$ EB                     | -0.063                   | 0.101        | 0.620           |                          |              |                 |
| random effects                    |                          |              |                 |                          |              |                 |
| $\sigma^2$                        | 0.83                     |              |                 | 0.83                     |              |                 |
| $\tau_{00}$                       | 0.01 <sub>REP:T:ID</sub> |              |                 | 0.00 <sub>REP:T:ID</sub> |              |                 |
|                                   | 0.00 <sub>REP:T</sub>    |              |                 | 0.00 <sub>REP:T</sub>    |              |                 |
|                                   | 0.20 <sub>REP</sub>      |              |                 | 0.20 <sub>REP</sub>      |              |                 |
| <i>n</i>                          | 6 REP                    |              |                 | 6 REP                    |              |                 |
|                                   | 4 T                      |              |                 | 4 T                      |              |                 |
|                                   | 240 ID                   |              |                 | 240 ID                   |              |                 |
| observations                      | 480                      |              |                 | 480                      |              |                 |
| marg. $R^2$ ; cond. $R^2$         | 0.024 / 0.222            |              |                 | 0.020 / 0.209            |              |                 |

| fixed effects                     | full model               |              |                 | min. adequate model      |              |                 |
|-----------------------------------|--------------------------|--------------|-----------------|--------------------------|--------------|-----------------|
|                                   | $\beta$                  | s.e.         | <i>t</i> -value | $\beta$                  | s.e.         | <i>t</i> -value |
| intercept                         | -0.043                   | 0.188        | 0.229           | 0.037                    | 0.146        | 0.253           |
| SE                                | -0.210                   | 0.207        | 1.013           | -0.203                   | 0.178        | 1.139           |
| HVG                               | 0.228                    | 0.225        | 1.013           | 0.188                    | 0.178        | 1.053           |
| HEG                               | 0.009                    | 0.253        | 0.036           | -0.182                   | 0.179        | 1.016           |
| LEG                               | 0.127                    | 0.261        | 0.488           | -0.159                   | 0.178        | 0.891           |
| S                                 | 0.115                    | 0.210        | 0.547           |                          |              |                 |
| EB                                | 0.130                    | 0.122        | 1.066           |                          |              |                 |
| SE $\times$ HVG                   | -0.232                   | 0.255        | 0.910           | -0.236                   | 0.253        | 0.935           |
| SE $\times$ HEG                   | 0.500                    | 0.262        | 1.909           | 0.467                    | 0.254        | 1.837           |
| <b>SE <math>\times</math> LEG</b> | <b>0.529</b>             | <b>0.261</b> | <b>2.023</b>    | <b>0.577</b>             | <b>0.252</b> | <b>2.288</b>    |
| SE $\times$ S                     | 0.018                    | 0.187        | 0.094           |                          |              |                 |
| SE $\times$ EB                    | -0.067                   | 0.103        | 0.654           |                          |              |                 |
| HVG $\times$ S                    | -0.091                   | 0.274        | 0.333           |                          |              |                 |
| HEG $\times$ S                    | -0.068                   | 0.274        | 0.247           |                          |              |                 |
| LEG $\times$ S                    | -0.430                   | 0.274        | 1.567           |                          |              |                 |
| HVG $\times$ EB                   | -0.048                   | 0.124        | 0.390           |                          |              |                 |
| HEG $\times$ EB                   | -0.303                   | 0.181        | 1.674           |                          |              |                 |
| LEG $\times$ EB                   | -0.006                   | 0.193        | 0.030           |                          |              |                 |
| S $\times$ EB                     | -0.134                   | 0.109        | 1.224           |                          |              |                 |
| random effects                    |                          |              |                 |                          |              |                 |
| $\sigma^2$                        | 0.95                     |              |                 | 0.95                     |              |                 |
| $\tau_{00}$                       | 0.02 <sub>REP:T:ID</sub> |              |                 | 0.01 <sub>REP:T:ID</sub> |              |                 |
|                                   | 0.00 <sub>REP:T</sub>    |              |                 | 0.00 <sub>REP:T</sub>    |              |                 |
|                                   | 0.03 <sub>REP</sub>      |              |                 | 0.03 <sub>REP</sub>      |              |                 |
| <i>n</i>                          | 6 REP                    |              |                 | 6 REP                    |              |                 |
|                                   | 4 T                      |              |                 | 4 T                      |              |                 |
|                                   | 240 ID                   |              |                 | 240 ID                   |              |                 |
| observations                      | 471                      |              |                 | 471                      |              |                 |
| marg. $R^2$ ; cond. $R^2$         | 0.044 / NA               |              |                 | 0.031 / NA               |              |                 |

| fixed effects                    | full model               |              |              | min. adequate model      |              |              |
|----------------------------------|--------------------------|--------------|--------------|--------------------------|--------------|--------------|
|                                  | $\beta$                  | s.e.         | z-value      | $\beta$                  | s.e.         | z-value      |
| intercept                        | -0.155                   | 0.576        | 3.239        | -0.216                   | 0.454        | 3.373        |
| <b>SE</b>                        | <i>2.711</i>             | <i>0.533</i> | <i>1.871</i> | <b>3.028</b>             | <b>0.445</b> | <b>2.487</b> |
| HVG                              | 2.876                    | 0.591        | 1.787        | 1.662                    | 0.457        | 1.111        |
| HEG                              | 1.799                    | 0.646        | 0.909        | 1.118                    | 0.473        | 0.236        |
| LEG                              | 2.573                    | 0.667        | 1.417        | 1.495                    | 0.460        | 0.874        |
| S (F)                            | 1.778                    | 0.542        | 1.061        |                          |              |              |
| EB                               | 1.037                    | 0.311        | 0.117        |                          |              |              |
| SE $\times$ HVG                  | -0.672                   | 0.619        | 0.643        | 0.647                    | 0.603        | 0.722        |
| SE $\times$ HEG                  | -0.696                   | 0.639        | 0.567        | 0.699                    | 0.620        | 0.577        |
| SE $\times$ LEG                  | -0.629                   | 0.642        | 0.722        | 0.603                    | 0.606        | 0.834        |
| SE $\times$ S                    | 1.226                    | 0.448        | 0.454        |                          |              |              |
| SE $\times$ EB                   | 1.039                    | 0.247        | 0.157        |                          |              |              |
| HVG $\times$ S                   | -0.352                   | 0.660        | 1.581        |                          |              |              |
| HEG $\times$ S                   | -0.510                   | 0.660        | 1.021        |                          |              |              |
| <i>LEG <math>\times</math> S</i> | <i>-0.290</i>            | <i>0.670</i> | <i>1.845</i> |                          |              |              |
| HVG $\times$ EB                  | -0.728                   | 0.300        | 1.060        |                          |              |              |
| HEG $\times$ EB                  | -0.807                   | 0.432        | 0.496        |                          |              |              |
| LEG $\times$ EB                  | -0.737                   | 0.453        | 0.675        |                          |              |              |
| S $\times$ EB                    | 1.091                    | 0.259        | 0.336        |                          |              |              |
| random effects                   |                          |              |              |                          |              |              |
| $\sigma^2$                       | 3.29                     |              |              | 3.29                     |              |              |
| $\tau_{00}$                      | 0.05 <sub>REP:T:ID</sub> |              |              | 0.06 <sub>REP:T:ID</sub> |              |              |
|                                  | 0.00 <sub>REP:T</sub>    |              |              | 0.00 <sub>REP:T</sub>    |              |              |
|                                  | 0.44 <sub>REP</sub>      |              |              | 0.49 <sub>REP</sub>      |              |              |
| <i>n</i>                         | 6 <sub>REP</sub>         |              |              | 6 <sub>REP</sub>         |              |              |
|                                  | 4 <sub>T</sub>           |              |              | 4 <sub>T</sub>           |              |              |
|                                  | 237 <sub>ID</sub>        |              |              | 237 <sub>ID</sub>        |              |              |
| observations                     | 474                      |              |              | 474                      |              |              |
| marg. $R^2$ ; cond. $R^2$        | 0.074 / NA               |              |              | 0.052 / NA               |              |              |

| fixed effects             | full model               |       |         | min. adequate model      |       |         |
|---------------------------|--------------------------|-------|---------|--------------------------|-------|---------|
|                           | $\beta$                  | s.e.  | z-value | $\beta$                  | s.e.  | z-value |
| intercept                 | -0.160                   | 0.633 | 2.896   | -0.132                   | 0.531 | 3.816   |
| SE                        | 1.874                    | 0.587 | 1.071   | 2.321                    | 0.495 | 1.701   |
| HVG                       | -0.995                   | 0.661 | 0.008   | -0.859                   | 0.555 | 0.274   |
| HEG                       | -0.626                   | 0.772 | 0.607   | -0.474                   | 0.619 | 1.204   |
| LEG                       | 1.652                    | 0.741 | 0.677   | 1.138                    | 0.533 | 0.243   |
| S                         | -0.630                   | 0.633 | 0.729   |                          |       |         |
| EB                        | 1.682                    | 0.363 | 1.432   |                          |       |         |
| SE $\times$ HVG           | 1.412                    | 0.728 | 0.473   | 1.289                    | 0.703 | 0.361   |
| SE $\times$ HEG           | 1.439                    | 0.793 | 0.458   | 1.186                    | 0.771 | 0.221   |
| SE $\times$ LEG           | 1.347                    | 0.726 | 0.410   | 1.508                    | 0.678 | 0.606   |
| SE $\times$ S             | 1.495                    | 0.560 | 0.717   |                          |       |         |
| SE $\times$ EB            | -0.803                   | 0.299 | 0.734   |                          |       |         |
| HVG $\times$ S            | -0.424                   | 0.846 | 1.015   |                          |       |         |
| HEG $\times$ S            | -0.877                   | 0.846 | 0.155   |                          |       |         |
| LEG $\times$ S            | -0.499                   | 0.773 | 0.899   |                          |       |         |
| HVG $\times$ EB           | -0.580                   | 0.368 | 1.481   |                          |       |         |
| HEG $\times$ EB           | -0.391                   | 0.598 | 1.573   |                          |       |         |
| LEG $\times$ EB           | -0.778                   | 0.512 | 0.489   |                          |       |         |
| S $\times$ EB             | -0.582                   | 0.340 | 1.591   |                          |       |         |
| random effects            |                          |       |         |                          |       |         |
| $\sigma^2$                | 3.29                     |       |         | 3.29                     |       |         |
| $\tau_{00}$               | 0.19 <sub>REP:T:ID</sub> |       |         | 0.21 <sub>REP:T:ID</sub> |       |         |
|                           | 0.00 <sub>REP:T</sub>    |       |         | 0.00 <sub>REP:T</sub>    |       |         |
|                           | 0.65 <sub>REP</sub>      |       |         | 0.69 <sub>REP</sub>      |       |         |
| $n$                       | 6 REP                    |       |         | 6 REP                    |       |         |
|                           | 4 T                      |       |         | 4 T                      |       |         |
|                           | 237 ID                   |       |         | 237 ID                   |       |         |
| observations              | 474                      |       |         | 474                      |       |         |
| marg. $R^2$ ; cond. $R^2$ | 0.179 / NA               |       |         | 0.111 / NA               |       |         |

191 **Table S4.** Parameter estimates of full models and minimal adequate models of individual  
192 responses in physiological state of house sparrows in relation with the Shannon diversity index of  
193 the groups during the social treatment period. Full models contain all the predictors, while  
194 minimal models contain the significant predictors and the sampling event  $\times$  Shannon diversity  
195 interaction even if not significant (predictor of interest). Statistically significant effects ( $t$ -value or  
196  $z$ -value  $\geq 2$ ) are marked in bold, while marginally significant effects are marked in italic ( $1.8 < t$ -  
197 value or  $z$ -value  $< 2$ ). (a) SMI – Scaled Mass Index (body condition), (b) H/L ratio – heterophil-  
198 to-lymphocyte ratio (indicator of physiological stress), (c) MDA – malondialdehyde (oxidative  
199 damage to lipids), (e) Agglutination – level of natural antibodies, (f) Lysis – activity of the  
200 complement system. Predictors: SE – sampling event (pre-treatment is the reference level), S –  
201 sex (male is the reference level), Sh – Shannon diversity index, EB – exploratory behaviour.  
202 Random effects: REP – study replicate ID, T – social treatment, ID – individual ID. For random  
203 effects,  $\sigma^2$  is the residual variance, while  $\tau_{00}$  is the variance explained by random factors.



|                                  | full model               |              |              | min. adequate model      |              |              |
|----------------------------------|--------------------------|--------------|--------------|--------------------------|--------------|--------------|
| fixed effects                    | $\beta$                  | s.e.         | $t$ -value   | $\beta$                  | s.e.         | $t$ -value   |
| intercept                        | 0.184                    | 0.091        | 2.009        | 0.214                    | 0.087        | 2.461        |
| SE                               | 0.047                    | 0.053        | 0.895        | 0.000                    | 0.037        | 0.000        |
| <b>S</b>                         | <b>-0.342</b>            | <b>0.130</b> | <b>2.642</b> | <b>-0.429</b>            | <b>0.120</b> | <b>3.561</b> |
| Sh                               | 0.085                    | 0.089        | 0.949        | 0.005                    | 0.063        | 0.085        |
| EB                               | 0.024                    | 0.088        | 0.271        |                          |              |              |
| SE $\times$ S                    | -0.095                   | 0.076        | 1.247        |                          |              |              |
| <b>SE <math>\times</math> Sh</b> | <b>0.140</b>             | <b>0.037</b> | <b>3.773</b> | <b>0.140</b>             | <b>0.037</b> | <b>3.800</b> |
| SE $\times$ EB                   | -0.001                   | 0.038        | 0.024        |                          |              |              |
| S $\times$ Sh                    | -0.153                   | 0.121        | 1.271        |                          |              |              |
| S $\times$ EB                    | 0.112                    | 0.124        | 0.904        |                          |              |              |
| random effects                   |                          |              |              |                          |              |              |
| $\sigma^2$                       | 0.16                     |              |              | 0.16                     |              |              |
| $\tau_{00}$                      | 0.78 <sub>REP:T:ID</sub> |              |              | 0.79 <sub>REP:T:ID</sub> |              |              |
|                                  | 0.00 <sub>REP:T</sub>    |              |              | 0.00 <sub>REP:T</sub>    |              |              |
|                                  | 0.00 <sub>REP</sub>      |              |              | 0.00 <sub>REP</sub>      |              |              |
| $n$                              | 6 REP                    |              |              | 6 REP                    |              |              |
|                                  | 4 T                      |              |              | 4 T                      |              |              |
|                                  | 240 ID                   |              |              | 240 ID                   |              |              |
| observations                     | 480                      |              |              | 480                      |              |              |
| marg. $R^2$ ; cond. $R^2$        | 0.307 / NA               |              |              | 0.259 / NA               |              |              |

| fixed effects             | full model               |              |                 | min. adequate model      |       |                 |
|---------------------------|--------------------------|--------------|-----------------|--------------------------|-------|-----------------|
|                           | $\beta$                  | s.e.         | <i>t</i> -value | $\beta$                  | s.e.  | <i>t</i> -value |
| intercept                 | 0.079                    | 0.201        | 0.392           | 0.000                    | 0.191 | 0.000           |
| SE                        | -0.170                   | 0.120        | 1.415           | 0.000                    | 0.084 | 0.000           |
| S                         | -0.159                   | 0.122        | 1.305           |                          |       |                 |
| Sh                        | 0.012                    | 0.076        | 0.160           | 0.032                    | 0.061 | 0.517           |
| EB                        | -0.042                   | 0.074        | 0.566           |                          |       |                 |
| <i>SE</i> × <i>S</i>      | <i>0.340</i>             | <i>0.173</i> | <i>1.971</i>    |                          |       |                 |
| SE × Sh                   | -0.069                   | 0.084        | 0.817           | -0.066                   | 0.084 | 0.787           |
| SE × EB                   | 0.113                    | 0.087        | 1.303           |                          |       |                 |
| S × Sh                    | 0.039                    | 0.085        | 0.460           |                          |       |                 |
| S × EB                    | -0.010                   | 0.087        | 0.115           |                          |       |                 |
| random effects            |                          |              |                 |                          |       |                 |
| $\sigma^2$                | 0.84                     |              |                 | 0.84                     |       |                 |
| $\tau_{00}$               | 0.00 <sub>REP:T:ID</sub> |              |                 | 0.00 <sub>REP:T:ID</sub> |       |                 |
|                           | 0.00 <sub>REP:T</sub>    |              |                 | 0.00 <sub>REP:T</sub>    |       |                 |
|                           | 0.20 <sub>REP</sub>      |              |                 | 0.20 <sub>REP</sub>      |       |                 |
| <i>n</i>                  | 6 REP                    |              |                 | 6 REP                    |       |                 |
|                           | 4 T                      |              |                 | 4 T                      |       |                 |
|                           | 240 ID                   |              |                 | 240 ID                   |       |                 |
| observations              | 480                      |              |                 | 480                      |       |                 |
| marg. $R^2$ ; cond. $R^2$ | 0.011 / NA               |              |                 | 0.001 / NA               |       |                 |

| fixed effects                    | full model               |              |              | min. adequate model      |              |              |
|----------------------------------|--------------------------|--------------|--------------|--------------------------|--------------|--------------|
|                                  | $\beta$                  | s.e.         | $t$ -value   | $\beta$                  | s.e.         | $t$ -value   |
| intercept                        | 0.019                    | 0.113        | 0.172        | -0.001                   | 0.092        | 0.007        |
| SE                               | -0.022                   | 0.130        | 0.173        | -0.001                   | 0.090        | 0.015        |
| S                                | -0.050                   | 0.131        | 0.379        |                          |              |              |
| Sh                               | 0.032                    | 0.081        | 0.389        | 0.054                    | 0.065        | 0.832        |
| EB                               | 0.015                    | 0.081        | 0.192        |                          |              |              |
| SE $\times$ S                    | 0.042                    | 0.188        | 0.221        |                          |              |              |
| <b>SE <math>\times</math> Sh</b> | <b>-0.217</b>            | <b>0.091</b> | <b>2.371</b> | <b>-0.224</b>            | <b>0.091</b> | <b>2.470</b> |
| SE $\times$ EB                   | -0.065                   | 0.095        | 0.691        |                          |              |              |
| S $\times$ Sh                    | 0.039                    | 0.092        | 0.426        |                          |              |              |
| S $\times$ EB                    | -0.044                   | 0.095        | 0.460        |                          |              |              |
| random effects                   |                          |              |              |                          |              |              |
| $\sigma^2$                       | 0.97                     |              |              | 0.96                     |              |              |
| $\tau_{00}$                      | 0.00 <sub>REP:T:ID</sub> |              |              | 0.00 <sub>REP:T:ID</sub> |              |              |
|                                  | 0.00 <sub>REP:T</sub>    |              |              | 0.00 <sub>REP:T</sub>    |              |              |
|                                  | 0.03 <sub>REP</sub>      |              |              | 0.03 <sub>REP</sub>      |              |              |
| $n$                              | 6 REP                    |              |              | 6 REP                    |              |              |
|                                  | 4 T                      |              |              | 4 T                      |              |              |
|                                  | 240 ID                   |              |              | 240 ID                   |              |              |
| observations                     | 471                      |              |              | 471                      |              |              |
| marg. $R^2$ ; cond. $R^2$        | 0.019 / 0.044            |              |              | 0.016 / NA               |              |              |

| fixed effects             | full model               |              |              | min. adequate model      |              |              |
|---------------------------|--------------------------|--------------|--------------|--------------------------|--------------|--------------|
|                           | $\beta$                  | s.e.         | z-value      | $\beta$                  | s.e.         | z-value      |
| intercept                 | -0.314                   | 0.364        | 3.189        | -0.277                   | 0.335        | 3.828        |
| <b>SE</b>                 | <b>1.957</b>             | <b>0.305</b> | <b>2.199</b> | <b>2.208</b>             | <b>0.219</b> | <b>3.615</b> |
| S                         | -0.808                   | 0.330        | 0.645        |                          |              |              |
| Sh                        | -0.767                   | 0.217        | 1.222        | -0.805                   | 0.181        | 1.194        |
| EB                        | -0.797                   | 0.197        | 1.151        |                          |              |              |
| SE $\times$ S             | 1.284                    | 0.438        | 0.572        |                          |              |              |
| SE $\times$ Sh            | 1.306                    | 0.227        | 1.177        | 1.318                    | 0.226        | 1.220        |
| SE $\times$ EB            | 1.051                    | 0.222        | 0.222        |                          |              |              |
| S $\times$ Sh             | 1.134                    | 0.226        | 0.555        |                          |              |              |
| S $\times$ EB             | 1.190                    | 0.225        | 0.773        |                          |              |              |
| random effects            |                          |              |              |                          |              |              |
| $\sigma^2$                | 3.29                     |              |              | 3.29                     |              |              |
| $\tau_{00}$               | 0.06 <sub>REP:T:ID</sub> |              |              | 0.07 <sub>REP:T:ID</sub> |              |              |
|                           | 0.00 <sub>REP:T</sub>    |              |              | 0.00 <sub>REP:T</sub>    |              |              |
|                           | 0.45 <sub>REP</sub>      |              |              | 0.48 <sub>REP</sub>      |              |              |
| $n$                       | 6 REP                    |              |              | 6 REP                    |              |              |
|                           | 4 T                      |              |              | 4 T                      |              |              |
|                           | 237 ID                   |              |              | 237 ID                   |              |              |
| observations              | 474                      |              |              | 474                      |              |              |
| marg. $R^2$ ; cond. $R^2$ | 0.060 / NA               |              |              | 0.052 / NA               |              |              |

| fixed effects             | full model               |              |              | min. adequate model      |              |              |
|---------------------------|--------------------------|--------------|--------------|--------------------------|--------------|--------------|
|                           | $\beta$                  | s.e.         | z-value      | $\beta$                  | s.e.         | z-value      |
| intercept                 | -0.157                   | 0.438        | 4.235        | -0.113                   | 0.414        | 5.267        |
| <b>SE</b>                 | <b>2.383</b>             | <b>0.344</b> | <b>2.523</b> | <b>2.851</b>             | <b>0.260</b> | <b>4.022</b> |
| S                         | -0.455                   | 0.440        | 1.789        |                          |              |              |
| Sh                        | 1.067                    | 0.250        | 0.258        | -0.927                   | 0.225        | 0.335        |
| EB                        | -0.938                   | 0.231        | 0.279        |                          |              |              |
| SE $\times$ S             | 1.436                    | 0.542        | 0.668        |                          |              |              |
| SE $\times$ Sh            | 1.124                    | 0.270        | 0.434        | 1.087                    | 0.268        | 0.311        |
| SE $\times$ EB            | -0.778                   | 0.270        | 0.929        |                          |              |              |
| S $\times$ Sh             | -0.737                   | 0.272        | 1.124        |                          |              |              |
| S $\times$ EB             | -0.777                   | 0.278        | 0.907        |                          |              |              |
| random effects            |                          |              |              |                          |              |              |
| $\sigma^2$                | 3.29                     |              |              | 3.29                     |              |              |
| $\tau_{00}$               | 0.16 <sub>REP:T:ID</sub> |              |              | 0.23 <sub>REP:T:ID</sub> |              |              |
|                           | 0.00 <sub>REP:T</sub>    |              |              | 0.00 <sub>REP:T</sub>    |              |              |
|                           | 0.63 <sub>REP</sub>      |              |              | 0.65 <sub>REP</sub>      |              |              |
| $n$                       | 6 REP                    |              |              | 6 REP                    |              |              |
|                           | 4 T                      |              |              | 4 T                      |              |              |
|                           | 237 ID                   |              |              | 237 ID                   |              |              |
| observations              | 474                      |              |              | 474                      |              |              |
| marg. $R^2$ ; cond. $R^2$ | 0.128 / NA               |              |              | 0.078 / NA               |              |              |

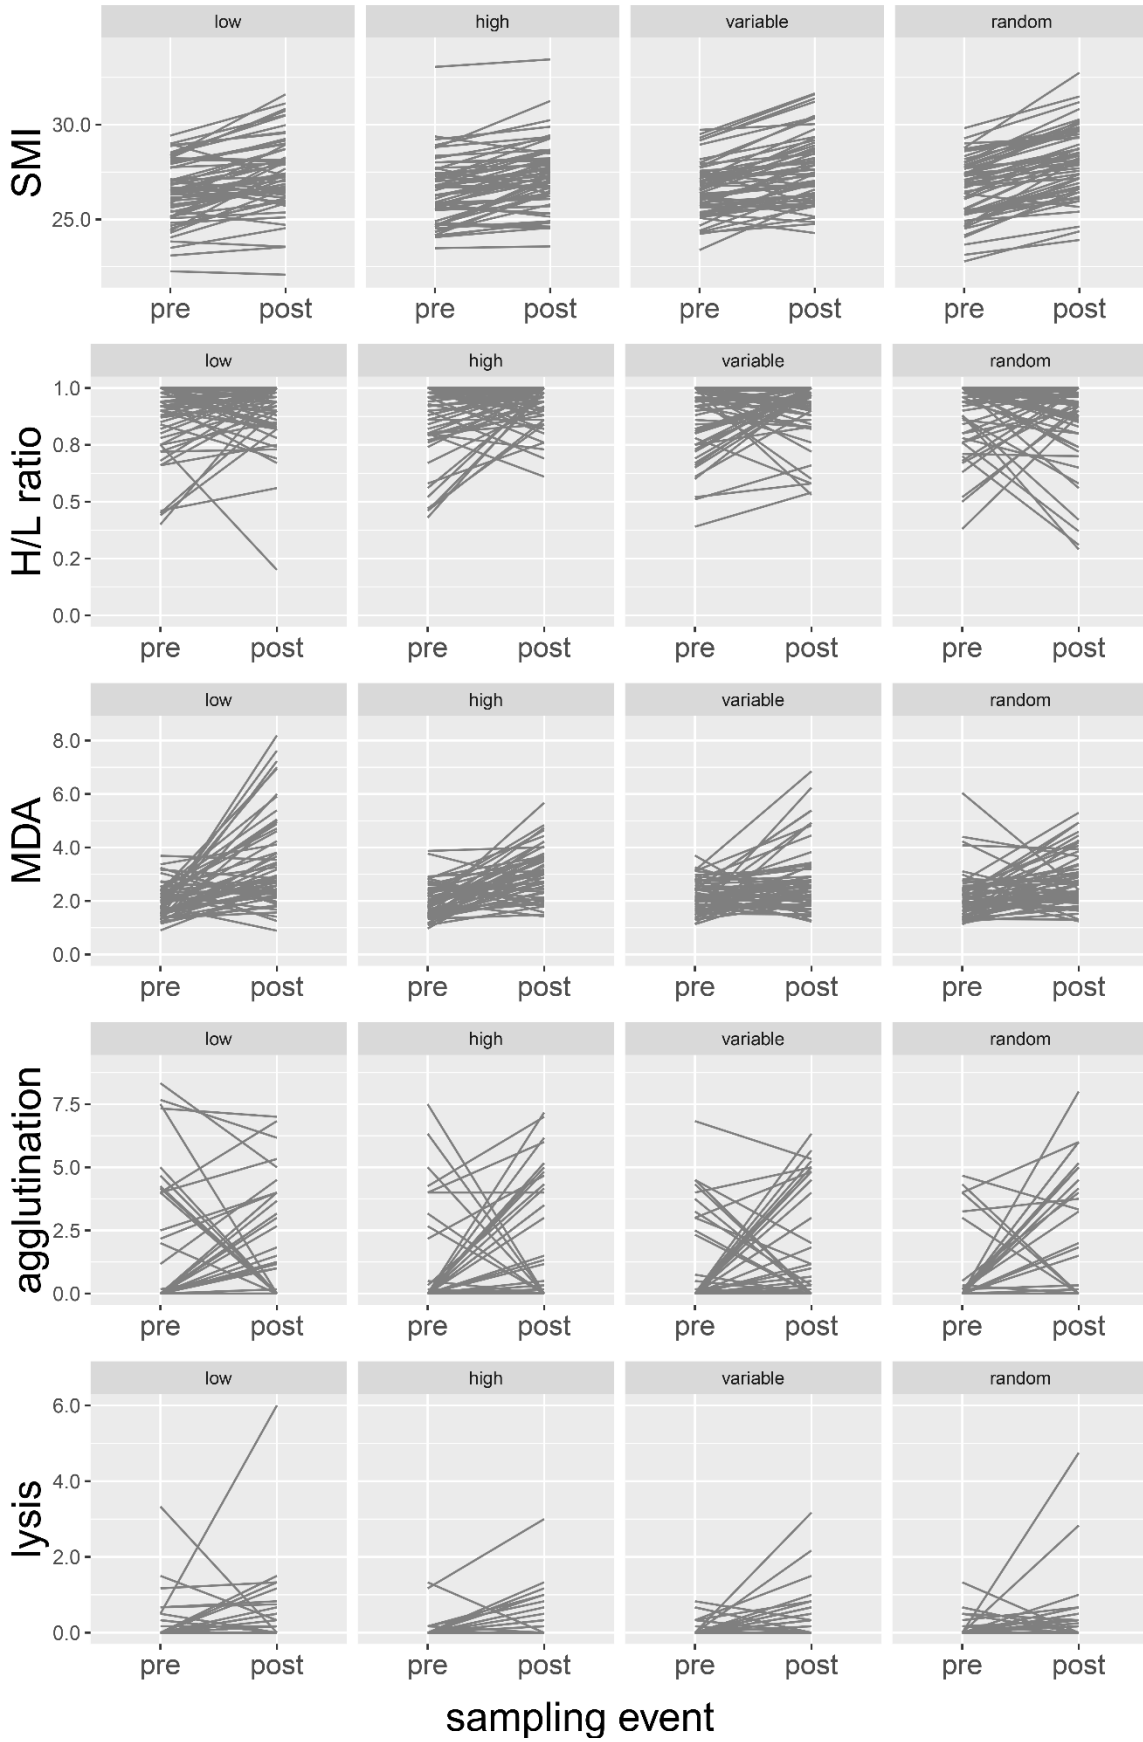

215 **Figure S3.** Individual reaction norms of physiological responses to social treatment. Each line  
216 denotes an individual ( $N = 60$  per group) connecting the pre-treatment value (sampling event =  
217 pre) with the post-treatment value (sampling event = post). Treatment groups: low = low-  
218 exploratory group, high = high-exploratory group, variable = variable group, random = random  
219 group.

220

## 221 References

- 222 1. Pap PL, Vágási CI, Czirják GÁ, Barta Z. 2008 Diet quality affects postnuptial molting and  
223 feather quality of the house sparrow (*Passer domesticus*): interaction with humoral  
224 immune function? *Can. J. Zool.* **86**, 834–842. (doi:10.1139/Z08-060)
- 225 2. Vágási CI, Pap PL, Barta Z. 2010 Haste makes waste: accelerated molt adversely affects  
226 the expression of melanin-based and depigmented plumage ornaments in house sparrows.  
227 *PLoS One* **5**, e14215. (doi:10.1371/journal.pone.0014215)
- 228 3. Dingemanse NJ, Both C, Drent PJ, van Oers K, van Noordwijk AJ. 2002 Repeatability and  
229 heritability of exploratory behaviour in great tits from the wild. *Anim. Behav.* **64**, 929–938.  
230 (doi:10.1006/anbe.2002.2006)
- 231 4. Stoffel MA, Nakagawa S, Schielzeth H. 2017 rptR: repeatability estimation and variance  
232 decomposition by generalized linear mixed-effects models. *Methods Ecol. Evol.* **8**, 1639–  
233 1644. (doi:10.1111/2041-210X.12797)
- 234 5. Nakagawa S, Schielzeth H. 2010 Repeatability for Gaussian and non-Gaussian data: a  
235 practical guide for biologists. *Biol. Rev.* **85**, 935–956. (doi:10.1111/j.1469-

- 236 185X.2010.00141.x)
- 237 6. Schielzeth H. 2010 Simple means to improve the interpretability of regression coefficients.  
238 *Methods Ecol. Evol.* **1**, 103–113. (doi:10.1111/j.2041-210X.2010.00012.x)
- 239 7. Peig J, Green AJ. 2009 New perspectives for estimating body condition from mass/length  
240 data: the scaled mass index as an alternative method. *Oikos* **118**, 1883–1891.  
241 (doi:10.1111/j.1600-0706.2009.17643.x)
- 242 8. Vágási CI, Pap PL, Vincze O, Benkő Z, Marton A, Barta Z. 2012 Haste makes waste but  
243 condition matters: molt rate–feather quality trade-off in a sedentary songbird. *PLoS One* **7**,  
244 e40651. (doi:10.1371/journal.pone.0040651)
- 245 9. Pap PL, Vágási CI, Vincze O, Osváth G, Veres-Szászka J, Czirják GÁ. 2015 Physiological  
246 pace of life: the link between constitutive immunity, developmental period, and metabolic  
247 rate in European birds. *Oecologia* **177**, 147–158. (doi:10.1007/s00442-014-3108-2)
- 248 10. Pap PL, Vágási CI, Czirják GÁ, Titilincu A, Pintea A, Osváth G, Fülöp A, Barta Z. 2011  
249 The effect of coccidians on the condition and immune profile of molting house sparrows  
250 (*Passer domesticus*). *Auk* **128**, 330–339. (doi:10.1525/auk.2011.10142)
- 251 11. Davis AK, Maney DL, Maerz JC. 2008 The use of leukocyte profiles to measure stress in  
252 vertebrates: a review for ecologists. *Funct. Ecol.* **22**, 760–772. (doi:10.1111/j.1365-  
253 2435.2008.01467.x)
- 254 12. Bókony V *et al.* 2014 Necessity or capacity? Physiological state predicts problem-solving  
255 performance in house sparrows. *Behav. Ecol.* **25**, 124–135. (doi:10.1093/beheco/art094)
- 256 13. Matson KD, Ricklefs RE, Klasing KC. 2005 A hemolysis–hemagglutination assay for



- 257 characterizing constitutive innate humoral immunity in wild and domestic birds. *Dev.*  
258 *Comp. Immunol.* **29**, 275–286. (doi:10.1016/j.dci.2004.07.006)
- 259 14. Pap PL, Czirják GÁ, Vágási CI, Barta Z, Hasselquist D. 2010 Sexual dimorphism in  
260 immune function changes during the annual cycle in house sparrows. *Naturwissenschaften*  
261 **97**, 891–901. (doi:10.1007/s00114-010-0706-7)
